1 **High-resolution repertoire analysis of Tfr and Tfh cells reveals unexpectedly**  
2 **high diversities indicating a bystander activation of follicular T cells**

3

4 **Classification:** Biological Sciences; Immunology and Inflammation

5 **Authors:** Paul-Gydéon Ritvo<sup>1</sup>, Wahiba Chaara<sup>1,2</sup>, Karim El Soufi<sup>2</sup>, Benjamin Bonnet<sup>1</sup>, Adrien  
6 Six<sup>1,2</sup>, Encarnita Mariotti-Ferrandiz<sup>1,2</sup>, David Klatzmann<sup>1,2\*</sup>

7 **Affiliations:**

8 <sup>1</sup> Sorbonne Université, INSERM, UMR S 959, Immunology-Immunopathology- Immunotherapy  
9 (I3); F-75005, Paris, France;

10 <sup>2</sup> Biotherapy (CIC-BTi) and Inflammation-Immunopathology-Biotherapy Department (DHU-  
11 i2B), Hôpital Pitié-Salpêtrière, AP-HP, F-75651, Paris, France;

12

13 \*Corresponding author: David Klatzmann, david.klatzmann@upmc.fr

14

15 **ABSTRACT**

16 T follicular helper (Tfh) and regulatory (Tfr) cells regulate B cell activation and ultimately  
17 antibody production. While concordant results show that Tfh cells are specific for the  
18 immunizing antigens, limited and even controversial results have been reported regarding the  
19 specificity of Tfr cells. Here we used high-throughput T cell receptor (TCR) sequencing to  
20 address this issue. We observed that although the Tfh- and Tfr-cell repertoires are less diverse  
21 than those of effector (Teff) and regulatory T (Treg) cells, they still represent thousands of  
22 clonotypes after immunization with a single antigen. T-cell receptor beta variable (TRBV) gene  
23 usage distinguishes both follicular T cells (Tfol) from non-Tfol cells, as well as helper (Teff and  
24 Tfh) vs. regulatory (Treg and Tfr) cells. Analysis of the sharing of clonotypes between samples  
25 revealed that a specific response to the immunizing antigen can only be detected in Tfh cells  
26 immunized with a non-self-antigen and Tfr cells immunized with a self-antigen. Finally, the Tfr  
27 TCR repertoire is more similar to that of Tregs than to that of Tfh or Teff cells. Altogether, our  
28 results highlight a bystander Tfol-cell activation during antigenic response in the germinal  
29 centres and support the Treg cell origin of Tfr cells.

30

31 **Significance Statement:** Follicular helper T (Tfh) cells promote high-affinity antibody  
32 production by B cells while follicular regulatory T (Tfr) cells represses it. The question of the  
33 specificity of follicular T (Tfol) cells is of utmost importance in the understanding of the  
34 antibody response specificity and our work is the first to analysed the global Tfol TCR  
35 repertoire in wild type mice. This allowed us not only to portray the overall global structure of  
36 these repertoires, but also to substantiate the fact that Tfr cells respond to self-antigen while  
37 Tfh cells respond to non self-antigen, a still controversial issue. Importantly, our work revealed  
38 an unexpected bystander activation of Tfol cells. We think and discuss that it has a general  
39 significance in immune responses and possibly immunopathologies.

40

## 41 INTRODUCTION

42 The germinal centre (GC) is an essential structure for the activation of B cells and the  
43 generation of high-affinity antibodies providing a humoral protection against pathogens (1, 2).

44 Follicular helper (Tfh) cells promote the differentiation and activation of B cells into plasma  
45 cells, enabling antibody production (3, 4). In contrast, the recently discovered T follicular

46 regulatory (Tfr) cells (5–7) inhibit this GC reaction, therefore reducing antibody production, in  
47 humans(6) and mice (7). Tfr also promote high-affinity antibodies, as mainly low-affinity

48 antibodies were detected in the absence of Tfr (8, 9). In addition, Tfr are increased in infectious  
49 diseases with insufficient antibody production (10–13). Contradictory results have been found

50 so far in autoimmune diseases, where Tfr are either increased or decreased (14–17). Their  
51 suppressive effect on Tfh and GC B cells is associated with the expression of CTLA-4 (18, 19).

52 We recently showed that Tfr control Tfh by IL-1 deprivation (20). This unknown mechanism  
53 was revealed after redefining Tfr phenotype as  $CD4^+CXCR5^{hi}PD1^{hi}Foxp3^-CD25^-$  (20), as

54 reported by others (21). Most studies on Tfr were performed on  
55  $CD4^+CXCR5^+PD1^+Foxp3^+CD25^+$  (22) cells, which we found to be enriched in conventional

56 regulatory T cells (20). Therefore, those recent observations highlight the need to revisit many  
57 aspects of Tfr cell biology as previous studies might have reported results from a mixture of

58 Tfr cells and regulatory T cells (Treg cells) (20).

59 Two such aspects are Tfr specificity and origin. It is believed that to activate B cells, Tfh cells  
60 must recognize the same antigen as the B cells they help (23, 24). Several studies based on

61 peptide-class II major histocompatibility complex (pMHC-II) tetramers (25, 26) or ELISPOT  
62 assays (27) established that Tfh cells are specific for peptides of the immunizing antigen.

63 However, contradictory results have been obtained for Tfr cells. A recent study addressed this

64 issue by comparing the T cell repertoires after immunization with the myelin oligodendrocyte  
65 glycoprotein (MOG) in wild-type and MOG knock-out mice. MOG is a self-antigen in the former  
66 and a non-self antigen in the latter. In both conditions, Tfr specific for the immunodominant  
67 peptide of MOG assessed by tetramers were identified, indicating that independently of the  
68 self or foreign nature of the immunizing antigen, Tfr cells could be specific for it (28). They also  
69 showed that Tfh cells share with Tfr cells TCRs specific for the immunizing antigen (28),  
70 suggesting that Tfr cells can differentiate from naïve helper T cells. In contrast, in a previous  
71 study using high-throughput sequencing (HTS) in immunized mice with a fixed TCR  $\beta$  chain, we  
72 reported oligoclonal expansion in Tfh cells and a broad TCR usage in Tfr cells from the same  
73 GCs (29). In addition, only Tfh specific for the immunizing antigen were found in draining  
74 lymph nodes, not Tfrs, and the Tfr repertoire was closer to Treg than to Tfh, suggesting a Treg  
75 origin. However, all these results (28, 29) were obtained with  $CD4^+CXCR5^{hi}PD1^{hi}Foxp3^+CD25^+$   
76 “Tfr” cells. Therefore, the observed TCR repertoire diversity and composition was probably  
77 that of a mixture of TCRs derived from Treg and Tfr cells.

78 In these previous studies, it should be noted that Tfr cell specificity was studied either (i) with  
79 tetramers that assess only limited specificities (28) or (ii) using HTS in TCR-transgenic mice  
80 with a biased repertoire (29). Here, we performed HTS on stringently defined Tfr cells  
81  $CD4^+PD1^{hi}CXCR5^{hi}Foxp3^+CD25^-$  from wild-type mice and compared their TCR repertoires to  
82 that of Tfh, Treg and T<sub>eff</sub> cells by HTS targeting the  $\beta$  chain. Cells were obtained from non-  
83 immunized mice or mice immunized either with a self-antigen (insulin, INS) or a non-self-  
84 antigen (ovalbumin, OVA). Our work reveals an unexpected high diversity of the repertoire of  
85 T<sub>fol</sub> cells indicative of a bystander activation during antigen-specific responses and support a  
86 Treg cell origin for Tfr cells.

## 87 RESULTS

88 To investigate the TCR $\beta$  repertoire of Tfr cells, we used mice with the transgenic expression of  
89 green-fluorescent protein (GFP) under the promoter of Foxp3 to purify Tfh (CD4<sup>+</sup>CD8<sup>-</sup>  
90 CXCR5<sup>hi</sup>PD1<sup>hi</sup>Foxp3<sup>-</sup>), Tfr (CD4<sup>+</sup>CD8<sup>-</sup>CXCR5<sup>hi</sup>PD1<sup>hi</sup>CD25<sup>-</sup>Foxp3<sup>+</sup>), Teff (CD4<sup>+</sup>CD8<sup>-</sup>CXCR5<sup>lo/-</sup>PD1<sup>lo/-</sup>  
91 Foxp3<sup>-</sup>) and Treg (CD4<sup>+</sup>CD8<sup>-</sup>CXCR5<sup>lo/-</sup>PD1<sup>lo/-</sup>Foxp3<sup>+</sup>) cells. In order to recover sufficient  
92 amounts of the scarce Tfr-cell population, cells were purified from pools of six to eight mice  
93 (later named "individuals") receiving the same treatment. We generated three pools of mice  
94 immunized intraperitoneally with OVA in alum, three pools of mice immunized with insulin  
95 (INS) in alum and two pools that were not immunized in order to study cells at homeostasis.  
96 Finally, we massively sequenced T-cell mRNA from sorted Tfr-, Tfh-, Teff- and Treg-cell subsets

97

### 98 *Tfol cells have a lower diversity than non-Tfol cells*

99 We first analyzed the TCR diversity of the four cell subsets in the three immunization settings.  
100 Sequence and clonotype numbers obtained for all samples are provided in **Supplementary**  
101 **Table S1** for reference. Rarefaction curves (**Fig. 1A**), which represent the observed numbers  
102 of different clonotypes (i.e. unique combination of TRBV-CDR3p-TRBJ) observed at a given  
103 sample size (i.e. number of TR sequences), showed that both Tfr- and Tfh-cell repertoires are  
104 less diverse than those of Teff and Treg cells. Indeed, from 100 000 sequences and over, Tfol-  
105 cell clonotype numbers are systematically two- to three-fold lower than that of Teff/Treg cells  
106 ( $p=0.0079$ , Mann-Whitney U). At the sequencing depth used, we have almost captured the  
107 entire diversity of Tfh and Tfr cell TCR repertoires, as shown by the almost flat slopes, while  
108 this is not the case for Teff and Treg cells.

109 Other commonly used diversity indices confirmed these observations. The percentage of the  
110 most predominant clonotypes that account for 50% of the sequences of a sample size (P50)  
111 of Tfol cells (1 to 2%) is significantly lower than the average P50 of Teff and Treg cell  
112 repertoires (**Fig. 1B**). This marked difference between Tfol and non-Tfol cells, which is more  
113 pronounced than the one evidenced by rarefaction curves, suggests that there are important  
114 clonotype expansions in Tfol cells. The Pielou index(30), ranging from 0 to 1, assesses the  
115 evenness of a repertoire: the higher the index the more equally represented the clonotypes  
116 are. Repertoire evenness is both high and yet significantly different for Treg and Teff cells. In  
117 contrast, the Pielou index is significantly lower for Tfol cells compared to non-Tfol cells (**Fig.**  
118 **1C**). The lower richness described by the rarefaction curves and the P50 index could thus be  
119 explained by a higher number of expansions among Tfr and Tfh cells compared with Teff and  
120 Treg cells.

121 This was confirmed by analyzing the frequency of the predominant clonotypes in the different  
122 cell populations (**Fig. 1D**). The predominant 1% of clonotypes for Tfr and Tfh cells represent at  
123 least 50% of the total repertoire, compared to only 10% for Teff and Treg cells. Some  
124 clonotypes represent more than 1% of the sample in Tfr- and Tfh-cell samples, which is not  
125 observed in Treg and Teff cells. Finally, reconstruction of immunoscope profiles from NGS data  
126 showed a Gaussian distribution profile for Teff and Treg cells, and numerous expansions in  
127 Tfol-cell samples, as exemplified for representative TRBVs (**Supplementary Fig. S1**).  
128 Altogether, these results suggest that the global characteristics of the Tfh- and Tfr-cell  
129 repertoires are similar and that both subsets have a skewed diversity compared to non-Tfol  
130 cells.

131

132 ***TRBV but not TRBJ genes are differentially used by the four cell populations***

133 We performed a principal component analysis (PCA) of TRBV (**Fig. 2A**) and TRBJ (**Fig. 2B**) gene  
134 frequencies. Strikingly, the first component (PC1) of the PCA using TRBV gene frequencies (**Fig.**  
135 **2A**), which explains about  $\approx 32\%$  of the variability, separates very well Tfol- from non-Tfol-cell  
136 subsets, while the second (PC2; 12% of the variability) separates the regulatory subsets (Tfr  
137 and Treg cells) from the non-regulatory ones. In contrast, no clear separation of the four T cell  
138 subsets (**Fig. 2B**) could be observed using TRBJ gene usage. The same analysis for the TRBVBJ  
139 combination frequencies (**Fig. 2C**) showed clear separation of the four T cell subsets, although  
140 only  $\approx 30\%$  of the variability is explained by the first two components compared to  $\approx 50\%$  when  
141 focusing on the TRBV gene frequencies only.

142 We next computed the Morisita–Horn (MH) index between all samples based on their TRBVBJ  
143 usage (**Fig. 2D**), which calculates a similarity score ranging from 0 (dissimilar) to 1 (similar)  
144 between each pair of samples, and performed a hierarchical clustering (Euclidean distance  
145 and “complete” method) of all the samples using this metric. In line with the PCA analysis, Tfh-  
146 and Tfr-cell samples (Tfol) were clustered together, apart from the Teff and Treg (non-Tfol)  
147 cells. However, Tfol samples are intermingled within their cluster. Although their TRBV and  
148 TRBVBJ usage appeared to distinguish regulatory vs. helper cells on PCA for Tfol and non-Tfol  
149 cells, the sharing of TRBVBJ gene usage between Treg and Teff cells is higher than that  
150 between Tfh and Tfr cells (**Fig. 2D, Supplementary Fig. S2**). Hierarchical clustering of TRBVBJ  
151 frequencies (**Fig. 2E**) also showed Teff and Treg cell co-clustering. In contrast, Tfol cells do not  
152 cluster together but are just separated from non-Tfol cells. This suggests heterogeneity among  
153 Tfol-cell samples.



154 Since samples originated from mice undergoing different immunization protocols, we  
155 independently computed the MH similarity matrix between samples from mice immunized  
156 with either INS (**Fig. 2F**) or OVA (**Fig. 2G**). Similar observations were made.

157 In order to understand whether the difference of TRBV and TRBVBJ usage between samples  
158 on PCA was due to major changes in TRBV usage at the individual level, we plotted the  
159 frequencies of TRBV genes of the four subsets and observed no major differences except for  
160 TRBV31 gene expression, which was overexpressed in Tfol cells (**Fig. 2H**). We confirmed these  
161 observations in all our samples (**Fig. 2I**). This further demonstrates a peculiar TRBV repertoire  
162 in Tfol vs. non-Tfol samples.

163

#### 164 ***The clonotype distribution is different among the four cell populations***

165 We further analyzed the data by exploring the diversity at the clonotype level. The projection  
166 of clonotype frequencies by PCA was performed on clonotypes shared by at least five samples  
167 to reduce noise due to private clonotypes. Tfol cells are well separated from non-Tfol cells on  
168 PC1 (34%). Strikingly, in contrast with our observations on the TRBVBJ usage, we observed  
169 that Tfh and Tfr cells are remarkably close to each other, while Teff and Treg cells are rather  
170 well separated (**Fig. 3A**). When focusing on Tfh and Tfr cells only, their differences were  
171 revealed. The two subsets are separated on the first two components with a PC1 of 26%,  
172 suggesting that the two subsets are close in **Figure 3A** because they have similar overall  
173 characteristics compared to non-Tfol cells, but are in fact different at a closer clonotype level  
174 (**Fig. 3B**). As expected, PCA also well separated Treg and Teff cells (**Fig. 3C**).

175

#### 176 ***Tfr and Tfh cells have distinct repertoires***

177 We first compared the clonotype composition of Tfr and Tfh cell repertoires irrespective of  
178 the immunization. We ordered all clonotypes of a given Tfr-cell sample by decreasing  
179 frequency and selected the 250 predominant clonotypes. For each of the 8 Tfr samples, we  
180 evaluated the frequencies of these 250 clonotypes in each of the seven other Tfr cell (or Tfh  
181 cell) samples and calculated a mean frequency of these 7 values (**Fig. 4A**). We plotted these  
182 means for each of the eight available samples (**Fig. 4B**). We used the same methodology with  
183 Tfh cell predominant clonotypes (**Fig. 4C**). Results showed that, irrespectively of immunization,  
184 clonotypes found predominantly in Tfr cells are also found in higher proportions in other Tfr-  
185 cell samples than in Tfh-cell samples (**Fig. 4B**). Conversely, clonotypes predominantly found in  
186 Tfh cells are mostly shared with other Tfh-cell samples rather than with Tfr-cell samples (**Fig.**  
187 **4C**).

188 We then performed a similar analysis for comparing the response to specific immunization.  
189 The 250 most predominant clonotypes of each of the Tfr cell samples from mice immunized  
190 with INS were analysed (i) in the two other Tfr samples of INS immunized mice, generating 6  
191 values that were plotted individually; and (ii) in the 3 other samples from Tfh from INS  
192 immunized mice, or the Tfr and Tfh of OVA immunized mice, generating 9 values per  
193 comparison, plotted individually (**Fig. 4D**). A similar analysis was performed for Tfr samples  
194 from OVA immunized mice (**Fig. 4E**). Results showed that frequent clonotypes from Tfr cells  
195 of mice immunized with INS are found in higher proportions in other Tfr-cell samples from  
196 mice immunized with INS than in the other Tfr-cell or Tfh-cell samples (**Fig. 4D**). This  
197 phenomenon was not observed for Tfr cells of mice immunized with OVA (**Fig. 4E**) suggesting  
198 that within the global repertoire a Tfr-self-antigen specific response can be detected.  
199 Conversely, Tfh cell major clonotypes were similarly found in Tfh cells regardless of the

200 immunizing antigen (**Fig. 4F-G**), suggesting that an antigen specific Tfh response cannot be  
201 detected within the global repertoire.

202 We further analysed the specific response to immunization within a more restricted repertoire  
203 of public clonotypes, i.e. those shared by three similar samples. Public clonotypes from Tfh  
204 samples of OVA-immunized mice represent an average of 5% of the repertoire of these cells,  
205 but less than 1% of the repertoires of the other categories of cells (Tfr cells from all conditions  
206 or Tfh cells from mice immunized with INS or nothing) (**Fig. 5A**). In contrast, public clonotypes  
207 from Tfh cells of mice immunized with INS were equally represented among all samples,  
208 amounting to 2% of their repertoire (Tfh and Tfr cells, irrespective of the immunization) (**Fig.**  
209 **5B**). Conversely, for Tfr cells there was three-fold higher clonotype sharing between Tfr cells  
210 from mice immunized with INS than for mice immunized with OVA (**Fig. 5C-D**).

211 Finally, we then attempted to reveal similarities between repertoires at a less stringent level  
212 using “grouping of lymphocyte interactions by paratope hotspots” (GLIPH) that clusters TCRs  
213 with a high probability of recognizing similar antigens owing to either conserved motifs of 2  
214 to 4 amino-acids and/or global similarity of complementarity-determining region 3 (CDR3)  
215 sequences(31). The majority of motifs shared by the 3 Tfr samples of mice immunized by INS  
216 were found into those shared by Tfr samples from mice immunized by OVA or from non-  
217 immunized mice (**Fig. 6A**). The same observation was made for Tfh cells (**Fig. 6B**).

218

### 219 ***Tfr cells share more of their repertoire with Treg than with Teff cells***

220 We represented the sharing of major clonotypes using a Venn diagram. The sharing of the 1%  
221 predominant clonotypes of Tfh, Tfr, Treg and Teff cells revealed that 13% of Tfr cell clonotypes  
222 are shared with Treg cells, while only 6% are shared with Teff cells. Conversely, 1,7% of Treg

223 cell clonotypes are shared with Tfr cells, while only 0.8% are shared with Tfh cells (**Fig. 7A**).

224 These observations are confirmed by the analysis of clonotypes sharing at the individual level.

225 Those of the 250 predominant clonotypes of Treg cells present in Tfr or Tfh cells represent an

226 approximately 5 times higher percentage of the repertoire of Tfr than Tfh cells, with numerous

227 expanded clonotypes (**Fig. 7B-C**). Similarly, those of the 250 predominant clonotypes of Tfr

228 cells present in Treg or Teff cells represent a higher percentage of the repertoire of Treg than

229 Teff cells (**Fig. 7D-E**).

230

231 **DISCUSSION**

232 *Tfh and Tfr cells have a higher TCR diversity than expected*

233 Tfol cell TCR repertoires are less diverse than those of non-Tfol cells (**Fig. 1**), but still  
234 surprisingly diverse. Indeed, these cells that expand in response to immunization are  
235 stringently identified (20) by markers that assign them to GCs, a specialized site in which  
236 antigen-specific antibodies are formed (2). In the GCs, antigen-specific B cells act as antigen-  
237 presenting cells for Tfh cells, implying that the B cells and the Tfh cells are specific for the same  
238 antigen. It could thus have been conjectured that Tfh cells that are responding to an  
239 immunization would have a repertoire limited to a few clonotypes, with large expansions.  
240 Instead, we found thousands of sequences in every Tfh- and Tfr-cell sample (**Fig. 1**), a point  
241 that was missed by analyzing Tfh cells purified using tetramers (28) or from mice bearing a  
242 fixed TCR $\beta$  chain (29). This observation indicates major bystander Tfol activation during the  
243 response to immunization. The number of Tfh cells increase approximately by 10 times after  
244 immunization with OVA. Assuming 40 main epitopes for OVA (32) and 1/40 000 the frequency  
245 (33) of T cells responding to each of these, this Tfh cell expansion should have resulted from  
246 an approximate 9000 fold expansion of these antigen specific cells, leading to mostly detect  
247 these much expanded clonotypes. This is clearly not observed, as the predominant 1% of  
248 clonotypes for Tfh cells represents approximately only 50% of the total repertoire.

249 Thus, our results establish that the overall expansion of Tfh cells after immunization results in  
250 part from the expansion of cells that are not responding to main OVA epitopes (nor to proteins  
251 from the adjuvant as we used alum). This suggest that the initial trigger of the immune  
252 response provided by dendritic cells could not only activate high-affinity antigen-specific Tfh  
253 cells (25), but also bystander T cells with specificity for other antigens presented by these

254 dendritic cells and/or activated under the effects of the cytokine environment. In this line, this  
255 bystander activation could be related to the major role of IL-1 in Tfh-cell activation that we  
256 recently reported (20). Alternatively, or complementarily, the very high cross-reactivity of  
257 single TCR that have been shown to recognize thousands of different peptides (33) could  
258 explain the bystander activation of cells bearing promiscuous TCRs with low affinity for the  
259 immunizing antigen, thus less strongly stimulated and not driven to highly proliferate. Looking  
260 at motif sharing further supports this as we found that a majority of motifs are shared  
261 between Tfr (or Tfh) cells regardless of the immunization.

262 Similarly, our results show that Tfr-cell repertoire diversity is high, regardless of the nature of  
263 the immunizing antigen. This bystander effect for Tfr activation is less unexpected as even in  
264 the context of a specific immunization, many other self-antigens are expressed by APCs.

265

266 *Tfh-cells predominantly respond to foreign antigens while Tfr-cell respond to self-antigens*

267 At the clonotype level, we confirmed previous observations (29) that Tfh and Tfr cells have  
268 two distinct repertoires. The predominant clonotypes of Tfr cells in one individual are  
269 systematically found at higher frequencies in Tfr cells of other individuals than in Tfh cells, and  
270 inversely for Tfh-cell predominant clonotypes.

271 Sharing of predominant clonotypes (either public or not) indicate that the Tfh cell response is  
272 mostly towards foreign antigens while the Tfr cells response is mostly towards self-antigens.

273 Mirrored observations were made for Tfr cells that appear to respond to self- rather than  
274 foreign-antigens. This is in agreement with our recent observation that Tfr cells increase  
275 significantly more in INS- compared with OVA-immunized animals (20). Therefore, the Tfr  
276 repertoire in OVA-immunized animals could reflect a bystander recruitment of Tfr cells,

277 independently of the immunizing antigen, while the Tfr repertoire in INS-immunized mice  
278 could also comprise a response to the immunizing antigen. This is also in line with a recent  
279 study showing that Tfr cells have an effect only on self-reactive antibody responses (34)

280

### 281 *The Tfr-cell repertoire is close to the Treg-cell repertoire*

282 Using stringently purified Tfr cells, devoid of contaminating Treg cells, we show that clonotype  
283 sharing likens the Tfr cell repertoire to the Treg-cell repertoire (**Fig. 7**). This provides an  
284 indication of the origin of Tfr cells. Indeed, it should be more difficult to mimic a repertoire  
285 than a phenotype. The follicular phenotype has been shown to be mainly dependent on the  
286 expression of Bcl6, and is thus triggered by the expression of this unique molecule (7, 35, 36).  
287 In contrast, major sharing in a repertoire is dependent on many complex processes, from cell  
288 selection in the thymus to the dynamics of post-thymic cells. Thus, the fact that two subsets  
289 (here Tfr and Treg cells) share more of their repertoire than with the other two subsets (Tfr  
290 and Tfh cells) is indicative of a higher probability of a common origin.

291 Altogether, our observations made for the first time with the full repertoire of *bona fide* CD25<sup>-</sup>  
292 Tfr cells that are not contaminated by Treg cells (20)(21, 22) highlight a repertoire related to  
293 that of Treg cells and as such that is in large part self-specific (37, 38) and a bystander  
294 activation of these cells.

295 This bystander effect could be evidenced because follicular cells (i) are terminally  
296 differentiated cells found in a highly specialized structure that should contain only cells  
297 responding to the immunization, and (ii) can be unambiguously identified and purified. While  
298 we are often biased to detect and focus on antigen specific responses, we believe that such a  
299 bystander activation could be a more general phenomenon in the T cell response to antigens.

300 It is now becoming clearer that in addition to specificity, there is an extraordinary fuzziness  
301 and plasticity in the immune system, which needs to be taken in consideration. Actually,  
302 autoantibodies have been found in healthy humans and mice in the absence of an  
303 immunization with their target antigens (39). It thus remains to study whether the bystander  
304 activation of Tfol has relevance for the development of immunopathologies.

305

306

307



308

## 309 **Material and Methods**

### 310 *Mice*

311 8- to 14-week-old male and female NOD Foxp3-gfp mice, which express the green-fluorescent  
312 protein (GFP) under the control of the Foxp3 gene promoter, were provided by V. Kuchroo,  
313 Brigham and Women's Hospital, Boston, MA. All animals were maintained at the University  
314 Pierre and Marie Curie Centre d'Expérimentation Fonctionnelle animal facility under specific  
315 pathogen-free conditions in agreement with current European legislation on animal care,  
316 housing and scientific experimentation (agreement number A751315). All procedures were  
317 approved by the local animal ethics committee.

### 318 *Immunization*

319 Mice were immunized once (D0) and sacrificed at D10. Intraperitoneal injection was  
320 performed with 100 µg of OVA (Ova A5503; Sigma-Aldrich) mixed with 500 µg of aluminium  
321 hydroxide (alum) gel (ALH303; Sigma) or with 4.5 IU of human insulin (Umuline Rapide; Lilly)  
322 mixed with 500 µg of alum.

### 323 *Cell sorting*

324 Splenocytes from immunized mice were stained with Ter-119-biotin and B220-biotin  
325 antibodies for 20 min at 4°C and labelled with anti-biotin magnetic beads (Miltenyi Biotec) for  
326 15 min at 4°C. B cells and erythrocytes were depleted on an AutoMACS separator (Miltenyi  
327 Biotec) following the manufacturer's procedure. Enriched T cells were stained for 20 min at  
328 4°C with the following monoclonal antibodies at predetermined optimal dilutions: CD4-V500  
329 (BD Biosciences), CD8a-AF700 (BD Biosciences), streptavidin-APC (eBioscience) or -APC-Cy7

330 (BD Biosciences), PD-1-PE (eBioscience), CXCR5-Biotin (BD Biosciences). CXCR5 staining was  
331 performed using biotinylated anti-CXCR5 for 30 min at 20°C followed by APC- or APC-Cy7-  
332 labelled streptavidin at 4°C. The following subsets were sorted on a BD FACS Aria II (BD  
333 Biosciences) with a purity > 98%: CD4<sup>+</sup>CD8<sup>-</sup>CXCR5<sup>hi</sup>PD-1<sup>hi</sup>Foxp3<sup>-</sup> T follicular helper T cells (Tfh);  
334 CD4<sup>+</sup>CD8<sup>-</sup>CXCR5<sup>hi</sup>PD-1<sup>hi</sup>Foxp3<sup>+</sup> follicular regulatory T cells (Tfr); CD4<sup>+</sup>CD8<sup>-</sup> CXCR5<sup>int/lo</sup>PD-  
335 1<sup>int/lo</sup>Foxp3<sup>+</sup> regulatory T cells (Treg) and CD4<sup>+</sup>CD8<sup>-</sup> CXCR5<sup>int/lo</sup>PD-1<sup>int/lo</sup>Foxp3<sup>-</sup> effector T cells  
336 (Teff). Sorted cells were stored in lysis buffer (Ambion) at -80°C until processing.

### 337 *TCR deep sequencing*

338 RNA from sorted cells was extracted using the RNAqueous kit (Ambion) and sent to  
339 iRepertoire<sup>®</sup> (Huntsville) for cDNA synthesis and TCR amplification following their protocol  
340 (40). Briefly, each TCR is reverse-transcribed using a set of 24 forward primers, each targeting  
341 one TRBV mouse gene, and a reverse primer located in the TRBC gene to ensure a complete  
342 coverage of the clonotype sequence. PCR1 primers include barcodes to allow sample  
343 identification after the sequencing. PCR1 products are then purified on magnetic beads and a  
344 second round of PCR is performed. Amplified libraries are excised from agarose gel and  
345 purified. Paired-end sequencing is then carried out on a Miseq Illumina sequencer using a  
346 2x250-bp read length protocol.

### 347 *TCR deep sequencing data processing*

348 Each FASTQ raw data file obtained from iRepertoire was processed for TRB sequence  
349 annotation using the clonotypeR toolkit and associated R packages (41). Each dataset can be  
350 summarized as a list of clonotypes (defined as a unique combination of TRBV-CDR3aa-TRBJ  
351 sequence) and their associated counts in the dataset. These values are computed to quantify

352 the differences between repertoires at several complementary levels. Clonotypes observed  
353 only once in a dataset were discarded.

#### 354 *Data analysis*

355 Statistical comparisons and multivariate analyses (PCA, hierarchical clustering, Venn  
356 diagrams) were performed using R software version 3.1.3 ([www.r-project.org](http://www.r-project.org)). The Morisita-  
357 Horn index (42) assesses the similarity between sample sets. It ranges from 0 (no common  
358 species between the two samples) to 1 (all species are equally present in the two samples).  
359 Unlike the Morisita index, the Morisita-Horn variant takes into account the relative abundance  
360 of species in the sample. P50 was calculated as the percentage of unique predominant  
361 clonotypes necessary to reach 50% of the total number of sequences in a given sample.  
362 Conserved motifs and global similarity of the CDR3 was assessed by “grouping of lymphocyte  
363 interactions by paratope hotspots” (GLIPH) (31) on the 10% most predominant clonotypes per  
364 sample. Motifs were first identified for each cell subset and per experimental condition. The  
365 motif sharing was assessed per experimental condition. Then the motifs shared by all the  
366 samples from a given experimental group were compared with those shared by all the samples  
367 from each of the other experimental condition per cell subset.

368 Statistical analysis were performed using the non-parametric Mann-Whitney U test on  
369 GraphPad Prism v5 (p-values are indicated in the figures such as ns:  $p > 0.05$ , \*:  $p < 0.05$ , \*\*:  $p < 0.01$ , \*\*\*:  $p < 0.001$ ).

371

372 **REFERENCES**

- 373 1. MacLennan IC (1994) Germinal centers. *Annu Rev Immunol* 12:117–139.
- 374 2. Victora GD, Nussenzweig MC (2012) Germinal centers. *Annu Rev Immunol* 30:429–457.
- 375 3. Crotty S (2014) T Follicular Helper Cell Differentiation, Function, and Roles in Disease.  
376 *Immunity* 41(4):529–542.
- 377 4. Vinuesa CG, Linterman MA, Goodnow CC, Randall KL (2010) T cells and follicular  
378 dendritic cells in germinal center B-cell formation and selection. *Immunol Rev*  
379 237(1):72–89.
- 380 5. Wollenberg I, et al. (2011) Regulation of the germinal center reaction by Foxp3+  
381 follicular regulatory T cells. *J Immunol Baltim Md 1950* 187(9):4553–4560.
- 382 6. Chung Y, et al. (2011) Follicular regulatory T (Tfr) cells with dual Foxp3 and Bcl6  
383 expression suppress germinal center reactions. *Nat Med* 17(8):983–988.
- 384 7. Linterman MA, et al. (2011) Foxp3+ follicular regulatory T cells control T follicular  
385 helper cells and the germinal center response. *Nat Med* 17(8):975–982.
- 386 8. Kawamoto S, et al. (2014) Foxp3(+) T cells regulate immunoglobulin a selection and  
387 facilitate diversification of bacterial species responsible for immune homeostasis.  
388 *Immunity* 41(1):152–165.
- 389 9. Wu H, et al. (2016) Follicular regulatory T cells repress cytokine production by follicular  
390 helper T cells and optimize IgG responses in mice. *Eur J Immunol* 46(5):1152–1161.
- 391 10. Miles B, et al. (2015) Follicular regulatory T cells impair follicular T helper cells in HIV  
392 and SIV infection. *Nat Commun* 6:8608.
- 393 11. Colineau L, et al. (2015) HIV-Infected Spleens Present Altered Follicular Helper T Cell  
394 (Tfh) Subsets and Skewed B Cell Maturation. *PLOS ONE* 10(10):e0140978.
- 395 12. Chen X, et al. (2015) Distribution of Peripheral Memory T Follicular Helper Cells in  
396 Patients with Schistosomiasis Japonica. *PLoS Negl Trop Dis* 9(8):e0004015.
- 397 13. Wang L, et al. (2014) Increased numbers of CD5+CD19+CD1dhighIL-10+ Bregs,  
398 CD4+Foxp3+ Tregs, CD4+CXCR5+Foxp3+ follicular regulatory T (TFR) cells in CHB or CHC  
399 patients. *J Transl Med* 12:251.
- 400 14. Dhaeze T, et al. (2015) Circulating Follicular Regulatory T Cells Are Defective in Multiple  
401 Sclerosis. *J Immunol Baltim Md 1950* 195(3):832–840.
- 402 15. Shan Y, et al. (2015) Higher frequency of peripheral blood follicular regulatory T cells in  
403 patients with new onset ankylosing spondylitis. *Clin Exp Pharmacol Physiol* 42(2):154–  
404 161.
- 405 16. Wen Y, et al. (2016) Imbalance of circulating CD4(+)CXCR5(+)FOXP3(+) Tfr-like cells and  
406 CD4(+)CXCR5(+)FOXP3(-) Tfh-like cells in myasthenia gravis. *Neurosci Lett* 630:176–182.

- 407 17. Wang J, et al. (2013) High frequencies of activated B cells and T follicular helper cells  
408 are correlated with disease activity in patients with new-onset rheumatoid arthritis.  
409 *Clin Exp Immunol* 174(2):212–220.
- 410 18. Wing JB, Ise W, Kurosaki T, Sakaguchi S (2014) Regulatory T cells control antigen-  
411 specific expansion of Tfh cell number and humoral immune responses via the  
412 coreceptor CTLA-4. *Immunity* 41(6):1013–1025.
- 413 19. Sage PT, Paterson AM, Lovitch SB, Sharpe AH (2014) The coinhibitory receptor CTLA-4  
414 controls B cell responses by modulating T follicular helper, T follicular regulatory, and T  
415 regulatory cells. *Immunity* 41(6):1026–1039.
- 416 20. Ritvo P-G, et al. (2017) Tfr cells lack IL-2R $\alpha$  but express decoy IL-1R2 and IL-1Ra and  
417 suppress the IL-1-dependent activation of Tfh cells. *Sci Immunol*.
- 418 21. Wing JB, et al. (2017) A distinct subpopulation of CD25<sup>-</sup> T-follicular regulatory cells  
419 localizes in the germinal centers. *Proc Natl Acad Sci*:201705551.
- 420 22. Maceiras AR, Graca L (2015) Identification of Foxp3<sup>+</sup> T follicular regulatory (Tfr) cells by  
421 flow cytometry. *Methods Mol Biol Clifton NJ* 1291:143–150.
- 422 23. Abbas AK, Burstein HJ, Bogen SA (1993) Determinants of helper T cell-dependent  
423 antibody production. *Semin Immunol* 5(6):441–447.
- 424 24. Lanzavecchia A (1990) Receptor-mediated antigen uptake and its effect on antigen  
425 presentation to class II-restricted T lymphocytes. *Annu Rev Immunol* 8:773–793.
- 426 25. Fazilleau N, et al. (2007) Lymphoid reservoirs of antigen-specific memory T helper cells.  
427 *Nat Immunol* 8(7):753–761.
- 428 26. Fazilleau N, McHeyzer-Williams LJ, Rosen H, McHeyzer-Williams MG (2009) The  
429 function of follicular helper T cells is regulated by the strength of T cell antigen receptor  
430 binding. *Nat Immunol* 10(4):375–384.
- 431 27. Leddon SA, Sant AJ (2012) The Peptide Specificity of the Endogenous T Follicular Helper  
432 Cell Repertoire Generated after Protein Immunization. *PLoS ONE* 7(10).  
433 doi:10.1371/journal.pone.0046952.
- 434 28. Aloulou M, et al. (2016) Follicular regulatory T cells can be specific for the immunizing  
435 antigen and derive from naive T cells. *Nat Commun* 7:10579.
- 436 29. Maceiras AR, et al. (2017) T follicular helper and T follicular regulatory cells have  
437 different TCR specificity. *Nat Commun* 8:ncomms15067.
- 438 30. Pielou EC (1966) The measurement of diversity in different types of biological  
439 collections. *J Theor Biol* 13:131–144.
- 440 31. Identifying specificity groups in the T cell receptor repertoire : Nature : Nature Research  
441 Available at:

- 442 <https://www.nature.com/nature/journal/v547/n7661/full/nature22976.html> [Accessed  
443 November 8, 2017].
- 444 32. IEDB.org: Free epitope database and prediction resource Available at:  
445 <http://www.iedb.org> [Accessed November 11, 2017].
- 446 33. Mason D (1998) A very high level of crossreactivity is an essential feature of the T-cell  
447 receptor. *Immunol Today* 19(9):395–404.
- 448 34. Botta D, et al. (2017) Dynamic regulation of T follicular regulatory cell responses by  
449 interleukin 2 during influenza infection. *Nat Immunol* advance online publication.  
450 doi:10.1038/ni.3837.
- 451 35. Nurieva RI, et al. (2009) Bcl6 Mediates the Development of T Follicular Helper Cells.  
452 *Science* 325(5943):1001–1005.
- 453 36. Johnston RJ, et al. (2009) Bcl6 and Blimp-1 Are Reciprocal and Antagonistic Regulators  
454 of T Follicular Helper Cell Differentiation. *Science* 325(5943):1006–1010.
- 455 37. Jordan MS, et al. (2001) Thymic selection of CD4+CD25+ regulatory T cells induced by  
456 an agonist self-peptide. *Nat Immunol* 2(4):301–306.
- 457 38. Ribot J, Romagnoli P, van Meerwijk JPM (2006) Agonist ligands expressed by thymic  
458 epithelium enhance positive selection of regulatory T lymphocytes from precursors  
459 with a normally diverse TCR repertoire. *J Immunol Baltim Md 1950* 177(2):1101–1107.
- 460 39. Quintana FJ, Cohen IR (2004) The natural autoantibody repertoire and autoimmune  
461 disease. *Biomed Pharmacother Biomedecine Pharmacother* 58(5):276–281.
- 462 40. O’Connell AE, et al. (2014) Next Generation Sequencing Reveals Skewing of the T and B  
463 Cell Receptor Repertoires in Patients with Wiskott–Aldrich Syndrome. *Front Immunol* 5.  
464 doi:10.3389/fimmu.2014.00340.
- 465 41. Plessy C, Mariotti-Ferrandiz E, Manabe R-I, Hori S (2015) clonotypeR--high throughput  
466 analysis of T cell antigen receptor sequences. *bioRxiv*:028696.
- 467 42. Horn HS (1966) Measurement of “Overlap” in Comparative Ecological Studies. *Am Nat*  
468 100(914):419–424.
- 469
- 470

471 **FIGURE LEGENDS**

472 **Fig. 1: Tfol cells display a lower diversity than non-Tfol cells, yet are polyclonal. (A)**

473 Representative rarefaction curves displaying the number of clonotypes as a function of the  
474 number of reads (sample size) were computed for two samples of each T cell subset randomly  
475 selected from OVA-immunized mice. For a sample size of 100 000 (vertical line), the number  
476 of unique clonotypes is higher in Treg and Teff cells than in Tfr and Tfh cells ( $p=0.0079$ , Mann-  
477 Whitney U). **(B-C)** P50 **(B)** and Pielou's evenness **(C)** indices were calculated for all the samples  
478 of each T cell subset (see **Supplemental Table 1** for details) and compared by the Mann-  
479 Whitney U test (\* $p<0.05$  ; \*\* $p<0.01$ , \*\*\* $p<0.001$ ). **(D)** Cumulative frequencies of the 1%  
480 predominant clonotypes for each of the 4 T cell subsets were calculated. One histogram bar  
481 represents one sample and one coloured line one clonotype.

482  
483 **Fig. 2: TRBV gene usage separates Tfol from non-Tfol cells. (A-C)** PCA projection of the four  
484 subset samples according to the first two components (x-axis:PC1; y-axis:PC2) is plotted for  
485 the TRBV usage **(A)**, TRBJ usage **(B)** or TRBVBJ usage **(C)** of the samples. **(D)** Hierarchical  
486 clustering heatmap of Morisita-Horn similarity index values for all pairs of samples according  
487 to the indicated colour scale. **(E)** Hierarchical clustering of TRBVBJ frequencies across samples.  
488 **(F-G)** Same analyses as D but for individuals immunized with OVA **(F)** or INS **(G)**. **(H)** Bar plot  
489 showing TRBV gene usage for four representative samples of the four T cell subsets. **(I)** Bar  
490 plot showing the TRBV31 usage among all non-Tfol vs. Tfol samples.

491 **Fig. 3: Clonotype composition distinguishes Tfr from Tfh cells. (A-C)** PCA is plotted according  
492 to the first two components (x-axis:PC1; y-axis:PC2) using the frequencies of the predominant  
493 clonotypes shared by at least five samples across the Tfr, Tfh, Treg and Teff cells **(A)**, Tfr and  
494 Tfh cells **(B)** and Treg and Teff cells **(C)**.

495 **Fig. 4: Tfr- and Tfh-cell predominant clonotypes are unique to each subset. (A)**  
496 Representative illustration of the average cumulative frequencies calculated for the 250 most  
497 predominant clonotypes (MPC) of Tfr (B) and Tfh (C), (B-C) Plots showing the average of the  
498 predominant Tfr-cell clonotypes among Tfr- and Tfh-cells samples of the other seven  
499 individuals (B), and of predominant Tfh-cell clonotypes among Tfr- and Tfh-cell samples of the  
500 other seven individuals (C). (D-G) Plots showing the representation of the predominant  
501 clonotypes from Tfr cells (D-E) and Tfh cells (F-G) from INS (D, F) and OVA (E, G) immunized  
502 mice among Tfr- and Tfh-cells samples of the other seven individuals depending on the  
503 immunizing antigen.

504

505 **Fig. 5: Tfr and Tfh are respectively self and non-self-antigen specific. (A-D)** Histograms  
506 showing the averages of cumulative frequencies of predominant clonotypes shared by the  
507 three Tfh-cell subsets across all subsets from mice immunized with OVA (A) or INS (B), or  
508 shared by the three Tfr subsets across all subsets from mice immunized with OVA (C) or INS  
509 (D).

510

511 **Fig. 6: Tfr- and Tfh-cell predominant motifs are independent of the immunizing antigen**

512 Venn diagrams showing shared motifs between Tfr-cell samples (A) and Tfh-cell samples (B).  
513 First, public motifs from Tfr (A) of non-immunized mice (red) or mice immunized with INS  
514 (green) or OVA (blue) were identified and then compared between each other. Same analysis  
515 was performed for Tfh motifs (B).

516



517 **Fig. 7: Tfr-cell repertoire supports a Treg-cell origin.** (A) Venn diagram between the 1%  
518 predominant clonotypes of Tfh, Tfr, Treg and Teff cells. (B) Histograms showing the cumulative  
519 frequency of the predominant Treg clonotypes shared with Tfr and Tfh cells. (C) Histograms  
520 showing the cumulative frequency of the predominant Tfr clonotypes shared with Treg and  
521 Teff cells. (D-E) Statistical analysis of the histograms shown in B (D) and C (E) (Mann-Whitney  
522 U, \*:  $p < 0.05$  ; \*\*:  $p < 0.01$ , \*\*\*:  $p < 0.001$ ).

523

524

525

526

527 **Figures**

528 **Fig. 1**

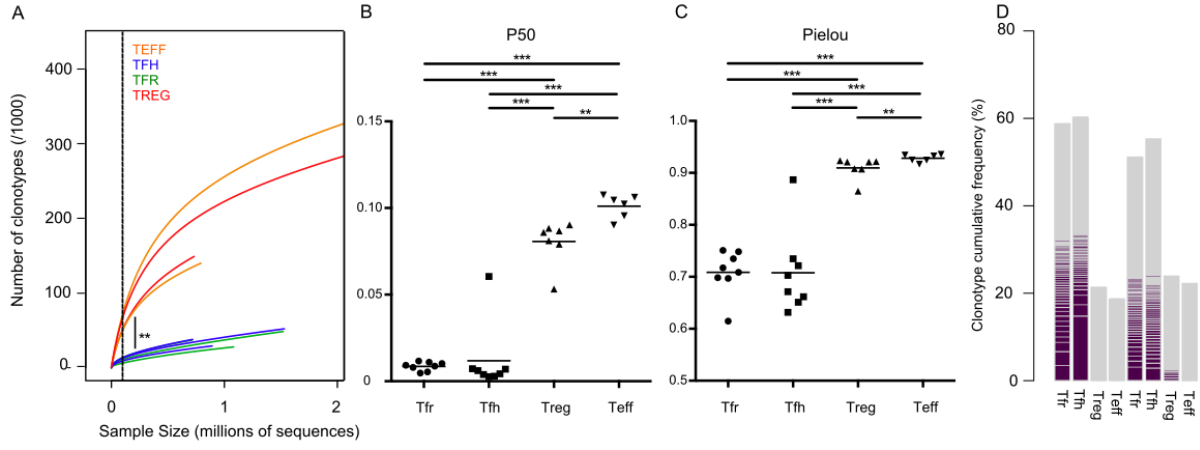

529

530 **Fig. 2**

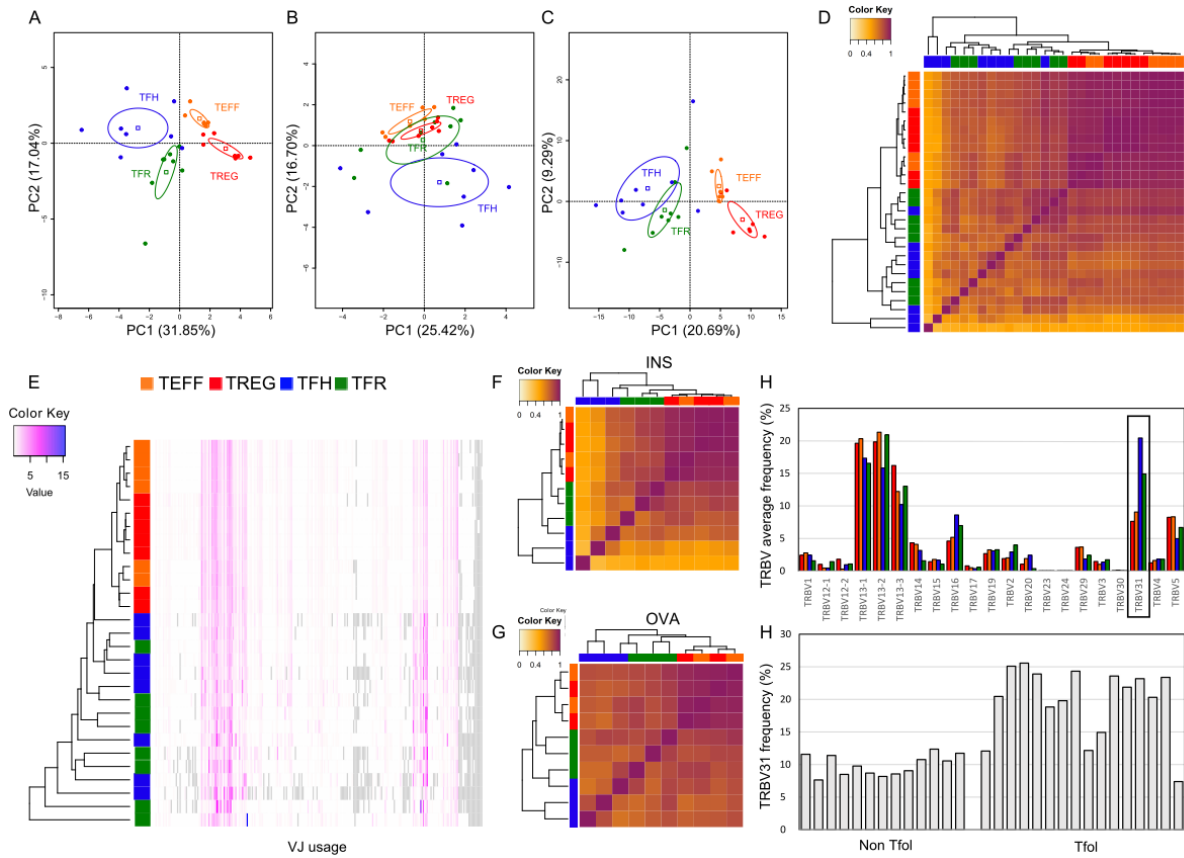

531

532 **Fig. 3**

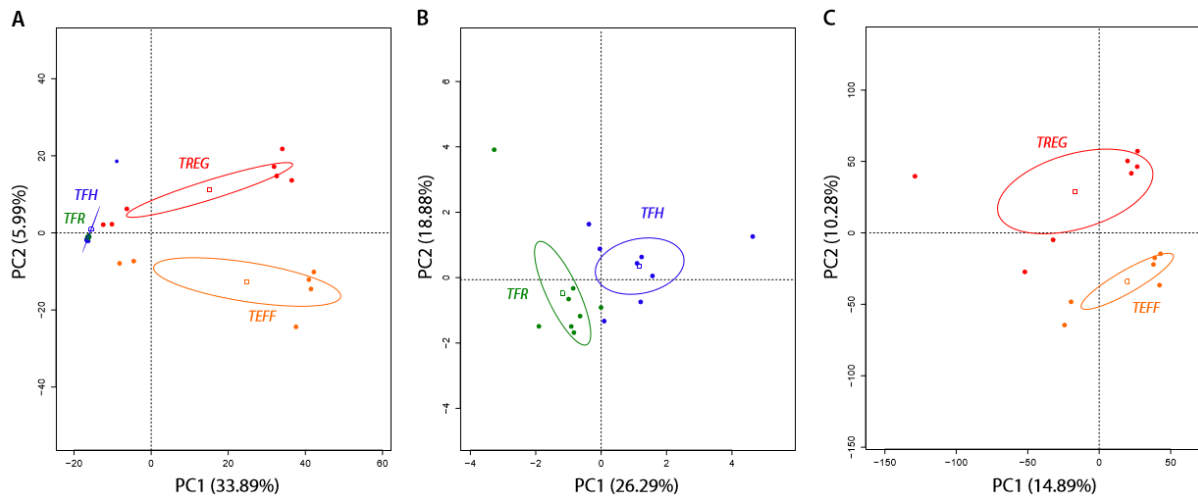

533

534 **Fig. 4**

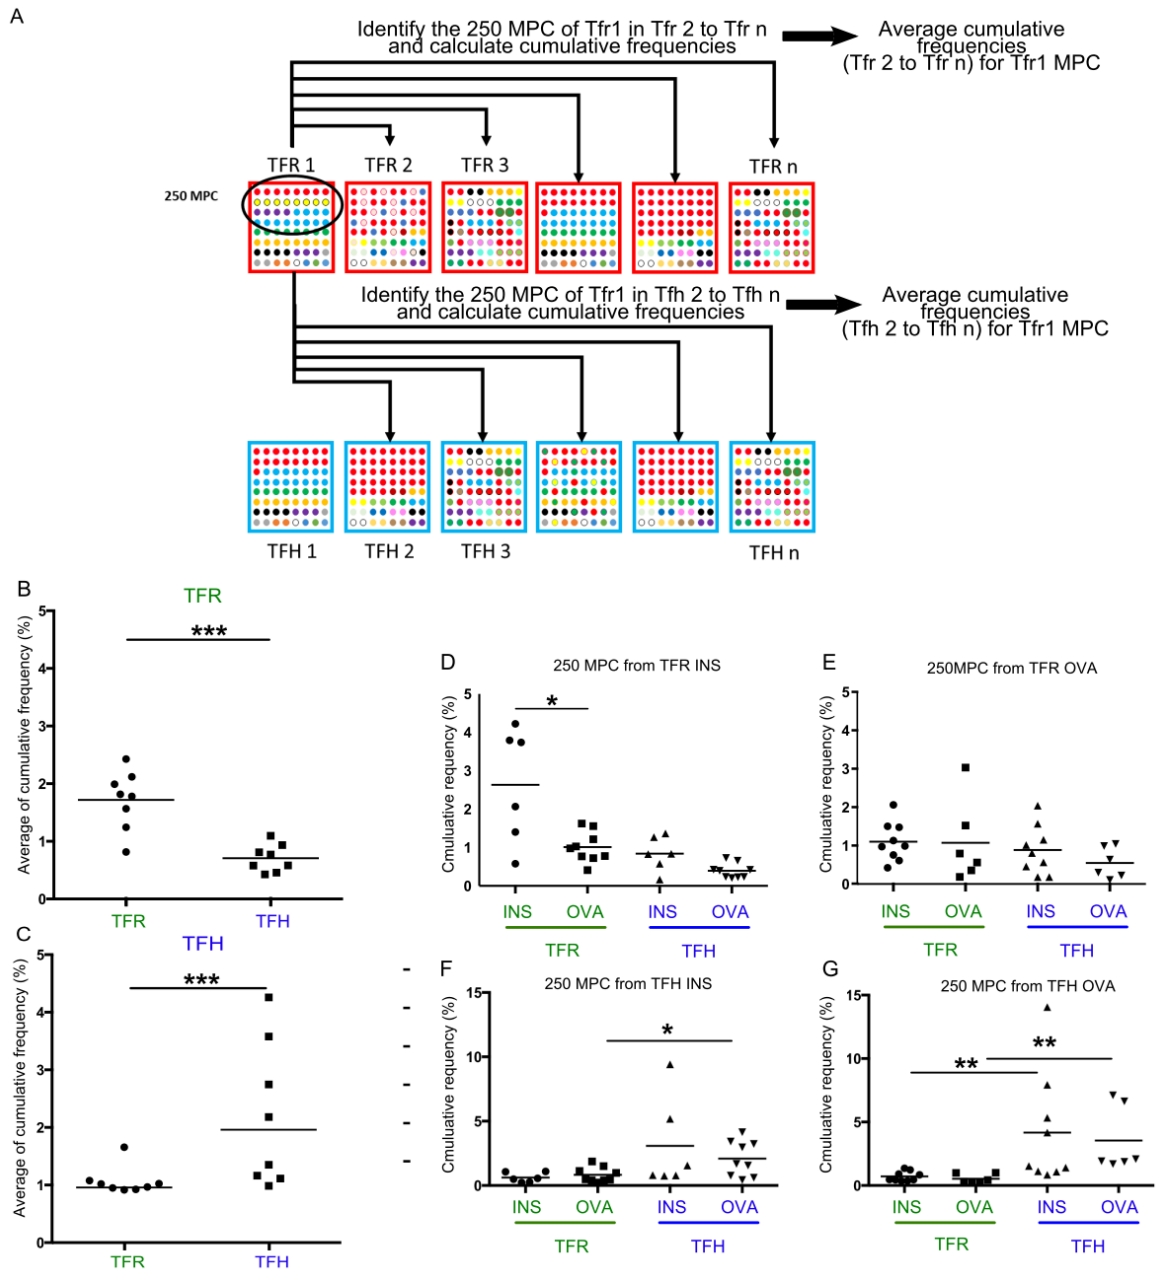

535

536 **Fig. 5**

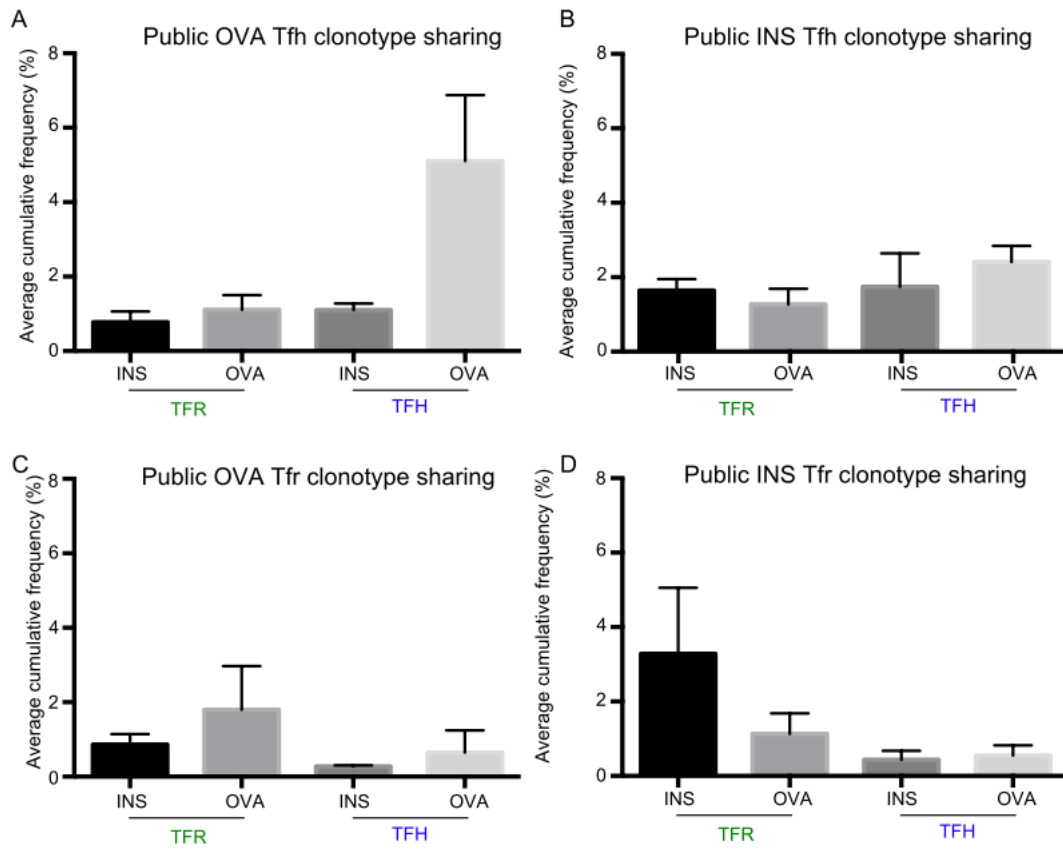

537

538 **Fig. 6**

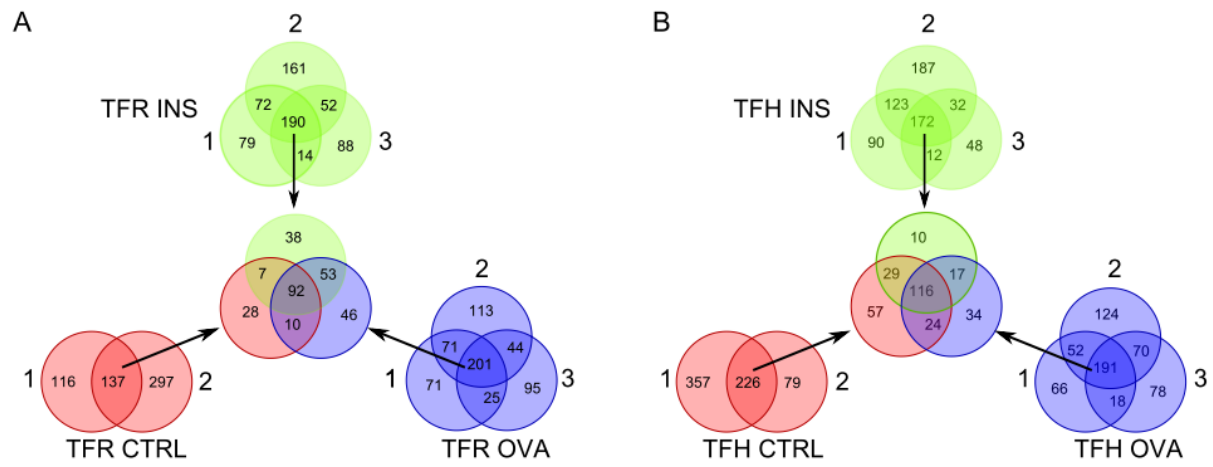

539

540 **Fig. 7**

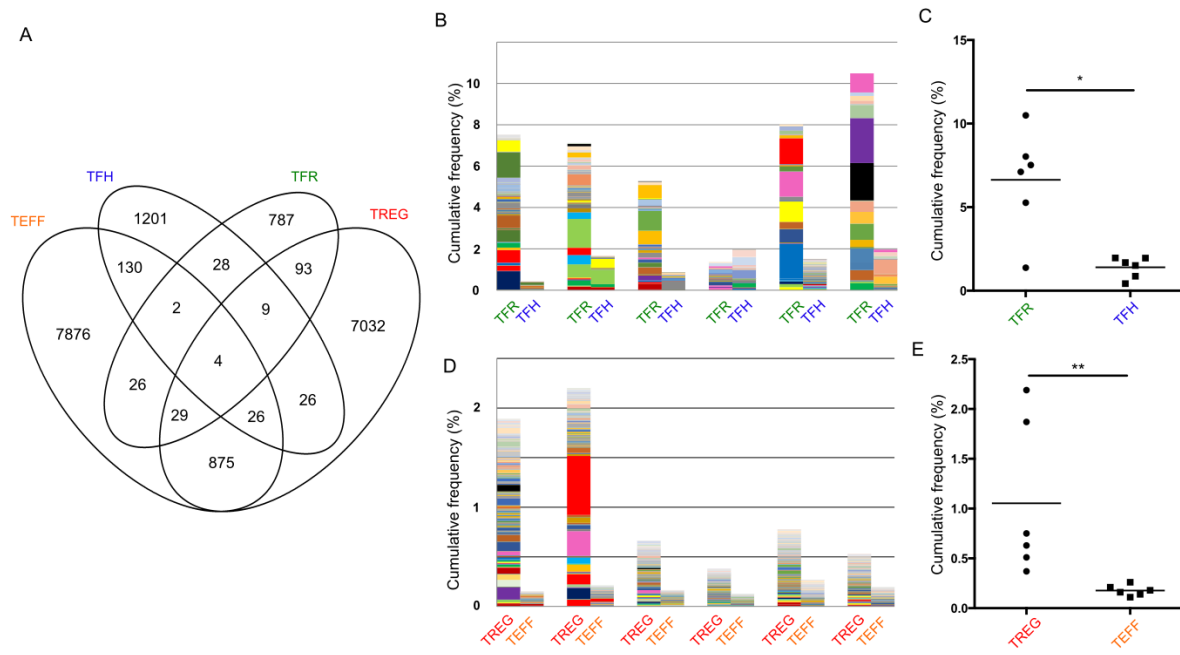

541

542 **Acknowledgments:** We are grateful to B. Gouritin and F. Brimaud for help in cell sorting and  
543 to G. Churlaud for help in experiments. We thank V Kuchroo for the mice provided.

544 **Funding:** PGR is an “Ecole de l’Inserm Liliane Bettencourt” doctoral fellow and is sponsored by  
545 Servier. The work of DK, EMF, AS, KES and BB and WC is funded by the Assistance Publique-  
546 Hôpitaux de Paris, INSERM, Sorbonne Université – UPMC, the LabEx Transimmunom (ANR-11-  
547 IDEX-0004-02),ERC Advanced TRiPoD (322856) and RHU iMAP grants.

548 **Author contributions:** PGR and BB performed the mouse experiments. PGR analyzed all the  
549 mouse data. KES performed the GLIPH study. PGR, EMF and DK conceived the experiments.  
550 WC conceived the workflow of analysis. PGR, EMF, AS and DK wrote the manuscript with input  
551 from all authors. DK conceived, supervised and obtained funding for the entire study.

552 **Competing interests:** The authors declare no conflict of interest.

553 **Data and materials availability:** All the data can be made available upon request.
